# Supplementary material for: Histone acetyltransferase CSRP2BP promotes the epithelial–mesenchymal transition and metastasis of cervical cancer cells by activating N-cadherin
Source: Springer Nature journal article supplement (doi:10.1186/s13046-023-02839-2), 2023-10-16
Supplement: MOESM4 [file 26191432]

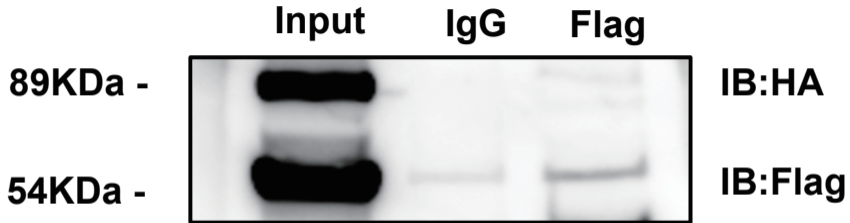

**Input:Flag-HA-smad3+HA-CSRP2BP**
